# Supplementary material
Source: PubMed Central journal article supplement (PMC10626430)
Supplement: EMBR-24-e57250-s006.pdf [file EMBR-24-e57250-s006.pdf]

## Expanded View Figures

**A** ALG-1 Wild type sequence 30 amino acids  
-VDREHDSGEGSQPSGTSEDTTLSNMARAVQ-  
# Netphos-3.1b prediction results

| Sequence   | # x  | Context   | Score | Kinase |
|------------|------|-----------|-------|--------|
| # Sequence | 7 S  | REHDSGEGS | 0.478 | CK II  |
| # Sequence | 7 S  | REHDSGEGS | 0.410 | CK I   |
| # Sequence | 11 S | SGEGSQPSG | 0.398 | CK I   |
| # Sequence | 11 S | SGEGSQPSG | 0.382 | CK II  |
| # Sequence | 14 S | GSQPSGTSE | 0.524 | CK I   |
| # Sequence | 14 S | GSQPSGTSE | 0.359 | CK II  |
| # Sequence | 16 T | QPSGTSED  | 0.394 | CK II  |
| # Sequence | 16 T | QPSGTSED  | 0.368 | CK I   |
| # Sequence | 17 S | PSGTSEDTT | 0.421 | CK I   |
| # Sequence | 17 S | PSGTSEDTT | 0.404 | CK II  |

**B** AGO-2 Wild type sequence 30 amino acids  
-VDKEHDSAEGSHTSGQSNRGRDHQALAKAVQ-  
# Netphos-3.1b prediction results

| Sequence   | # x  | Context    | Score | Kinase |
|------------|------|------------|-------|--------|
| # Sequence | 7 S  | KEHDSAEGS  | 0.508 | CK I   |
| # Sequence | 7 S  | KEHDSAEGS  | 0.453 | CK II  |
| # Sequence | 11 S | SAEGSHTSG  | 0.415 | CK I   |
| # Sequence | 11 S | SAEGSHTSG  | 0.335 | CK II  |
| # Sequence | 13 T | EGSHTSGQS  | 0.389 | CK II  |
| # Sequence | 13 T | EGSHTSGQS  | 0.371 | CK I   |
| # Sequence | 14 S | GSHTSGQSN  | 0.450 | CK I   |
| # Sequence | 14 S | GSHTSGQSN  | 0.305 | CK II  |
| # Sequence | 17 S | TSGQSNRGRD | 0.378 | CK I   |
| # Sequence | 17 S | TSGQSNRGRD | 0.323 | CK II  |

**Figure EV1.** CK1A1 and CK2 were both predicted to be phosphorylating the S988:S998 cluster on ALG-1 and S824:S834 cluster on AGO2 by Netphos3.1 online database.

- A Netphos3.1 scores of CKI and CK2 phosphorylating the different phosphorylatable Serine residues (S988, S992, S995, and S998) and a Threonine residue (T997) within the S988:S998 cluster on ALG-1 in *Caenorhabditis elegans*.
- B Netphos3.1 scores of CKI and CK2 phosphorylating the different phosphorylatable Serine residues (S824, S828, S831, and S834) and a Threonine residue (T830) within the S824:S834 cluster on AGO2 in humans.

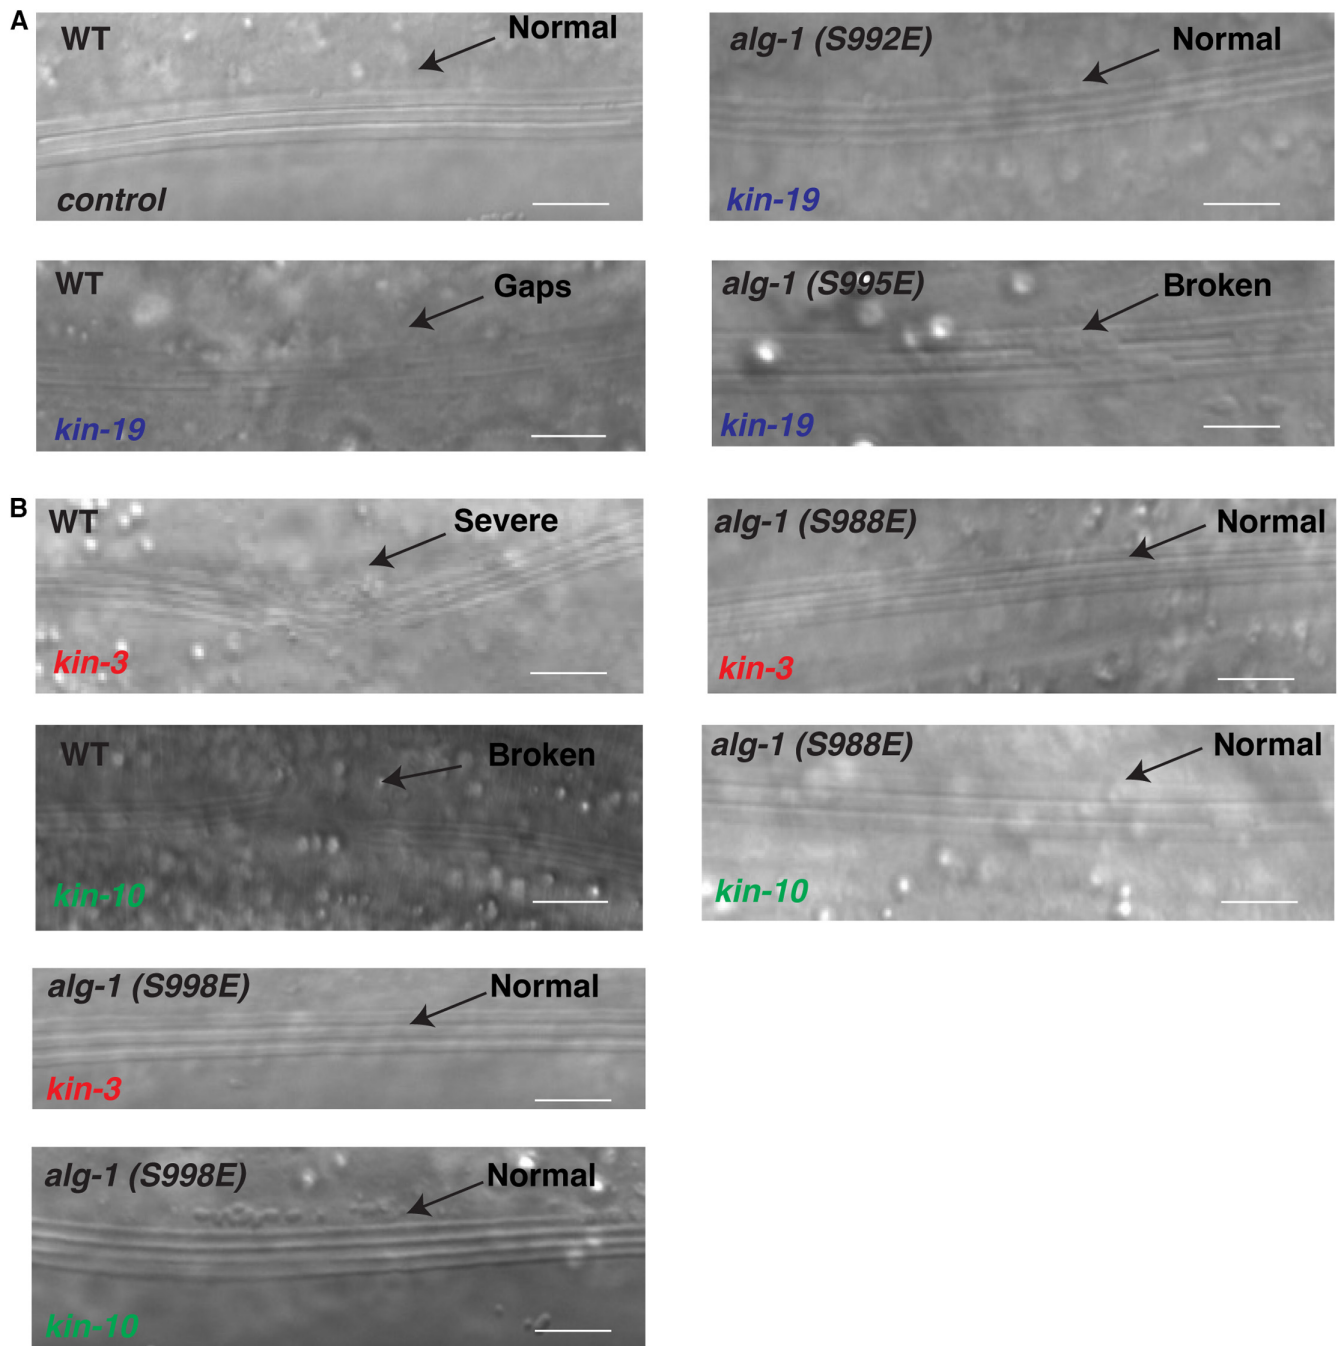

**Figure EV2. CK1A1 depletion in *alg-1(S992E)* and *alg-1(S995E)* animals and CK2 depletion in *alg-1(S988E)* and *alg-1(S998E)* animals rescue alae defects (a phenotype associated with reduced miRNA pathway function).**

A, B Representative images with alae structure (normal and defective) are shown for all conditions. The scale bar represents 10  $\mu\text{m}$ .

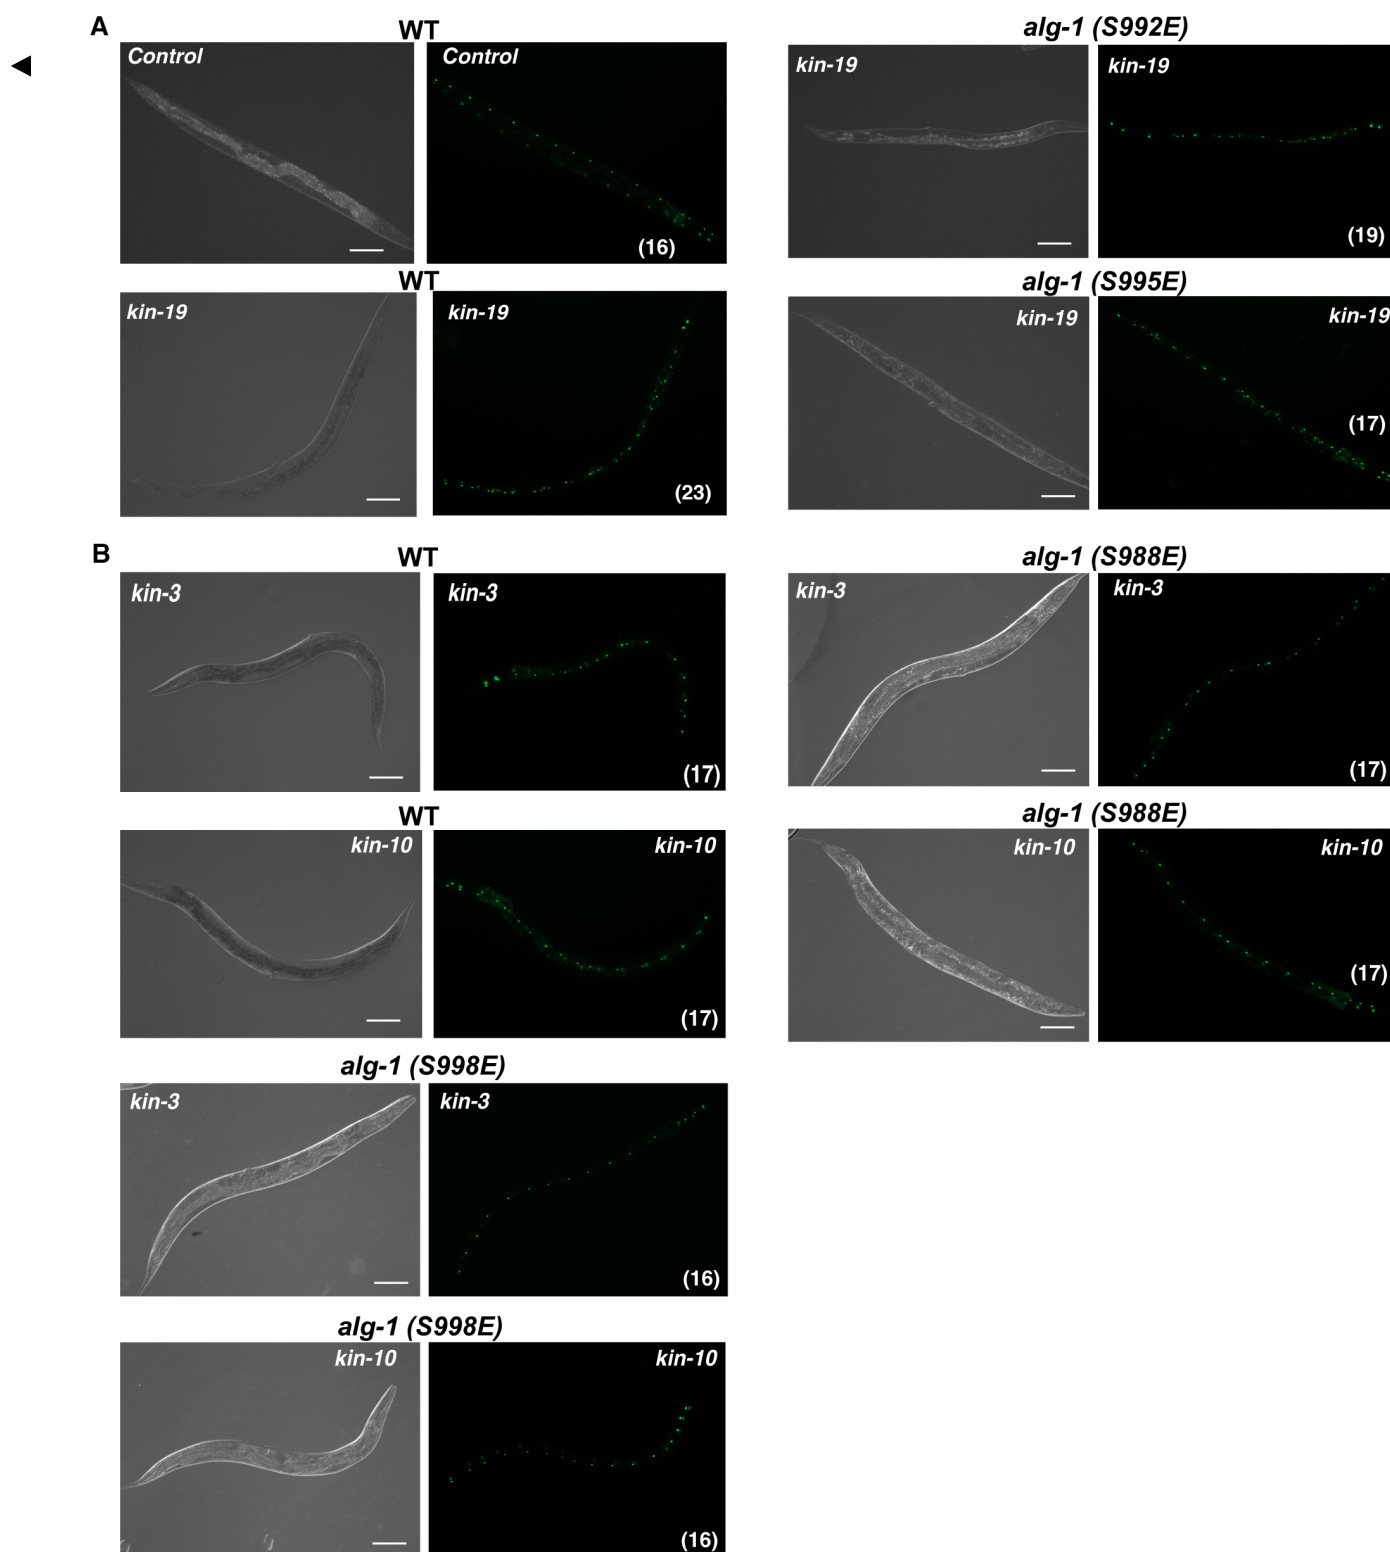

**Figure EV3.** CK1A1 depletion in *alg-1(S992E)* and *alg-1(S995E)* animals and CK2 depletion in *alg-1(S988E)* and *alg-1(S998E)* animals rescue seam cell defects (a phenotype associated with reduced miRNA pathway function).

A, B Representative pictures of seam cell *gfp* reporter expression (normal and abnormal) are shown for all conditions. The number in brackets indicates the number of seam cells. The scale bar represents 100  $\mu$ m.

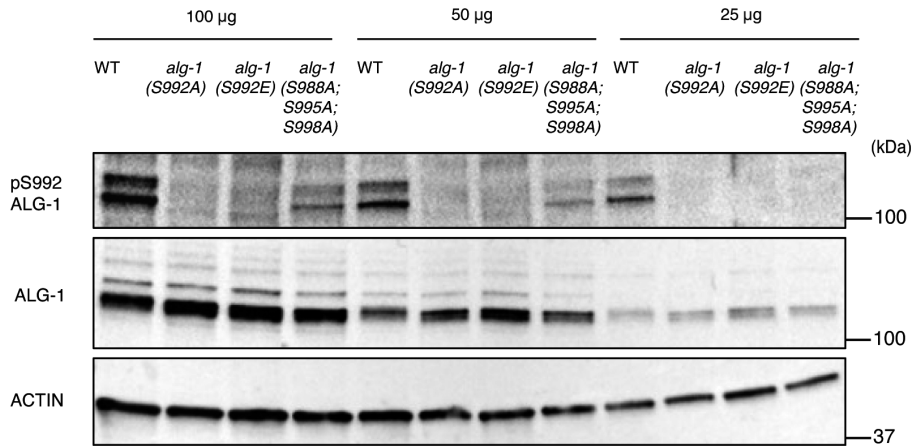

**Figure EV4. Specificity of the phospho-specific antibody to the S992 site within the S988:S998 cluster on ALG-1.**

Representative Western blot of pALG-1 (S992) and ALG-1 in wild-type, *alg-1*(S992A), *alg-1*(S992E), and *alg-1*(S988A;S995A;S998A) young adult worm extracts at different protein concentrations of 100, 50, and 25 µg to demonstrate the specificity of the phospho-specific antibody. ACTIN is used as a loading control.

Source data are available online for this figure.

**Figure EV5. Functional analysis using a *let-7* miRNA reporter.**

A, B CK1A1 depletion in *alg-1*(S992E) and *alg-1*(S995E) animals and CK2 depletion in *alg-1*(S988E) and *alg-1*(S998E) animals rescue *let-7* miRNA reporter de-repression. Representative pictures of *let-7* miRNA reporter expression are shown for all conditions. The scale bar represents 20 µm.

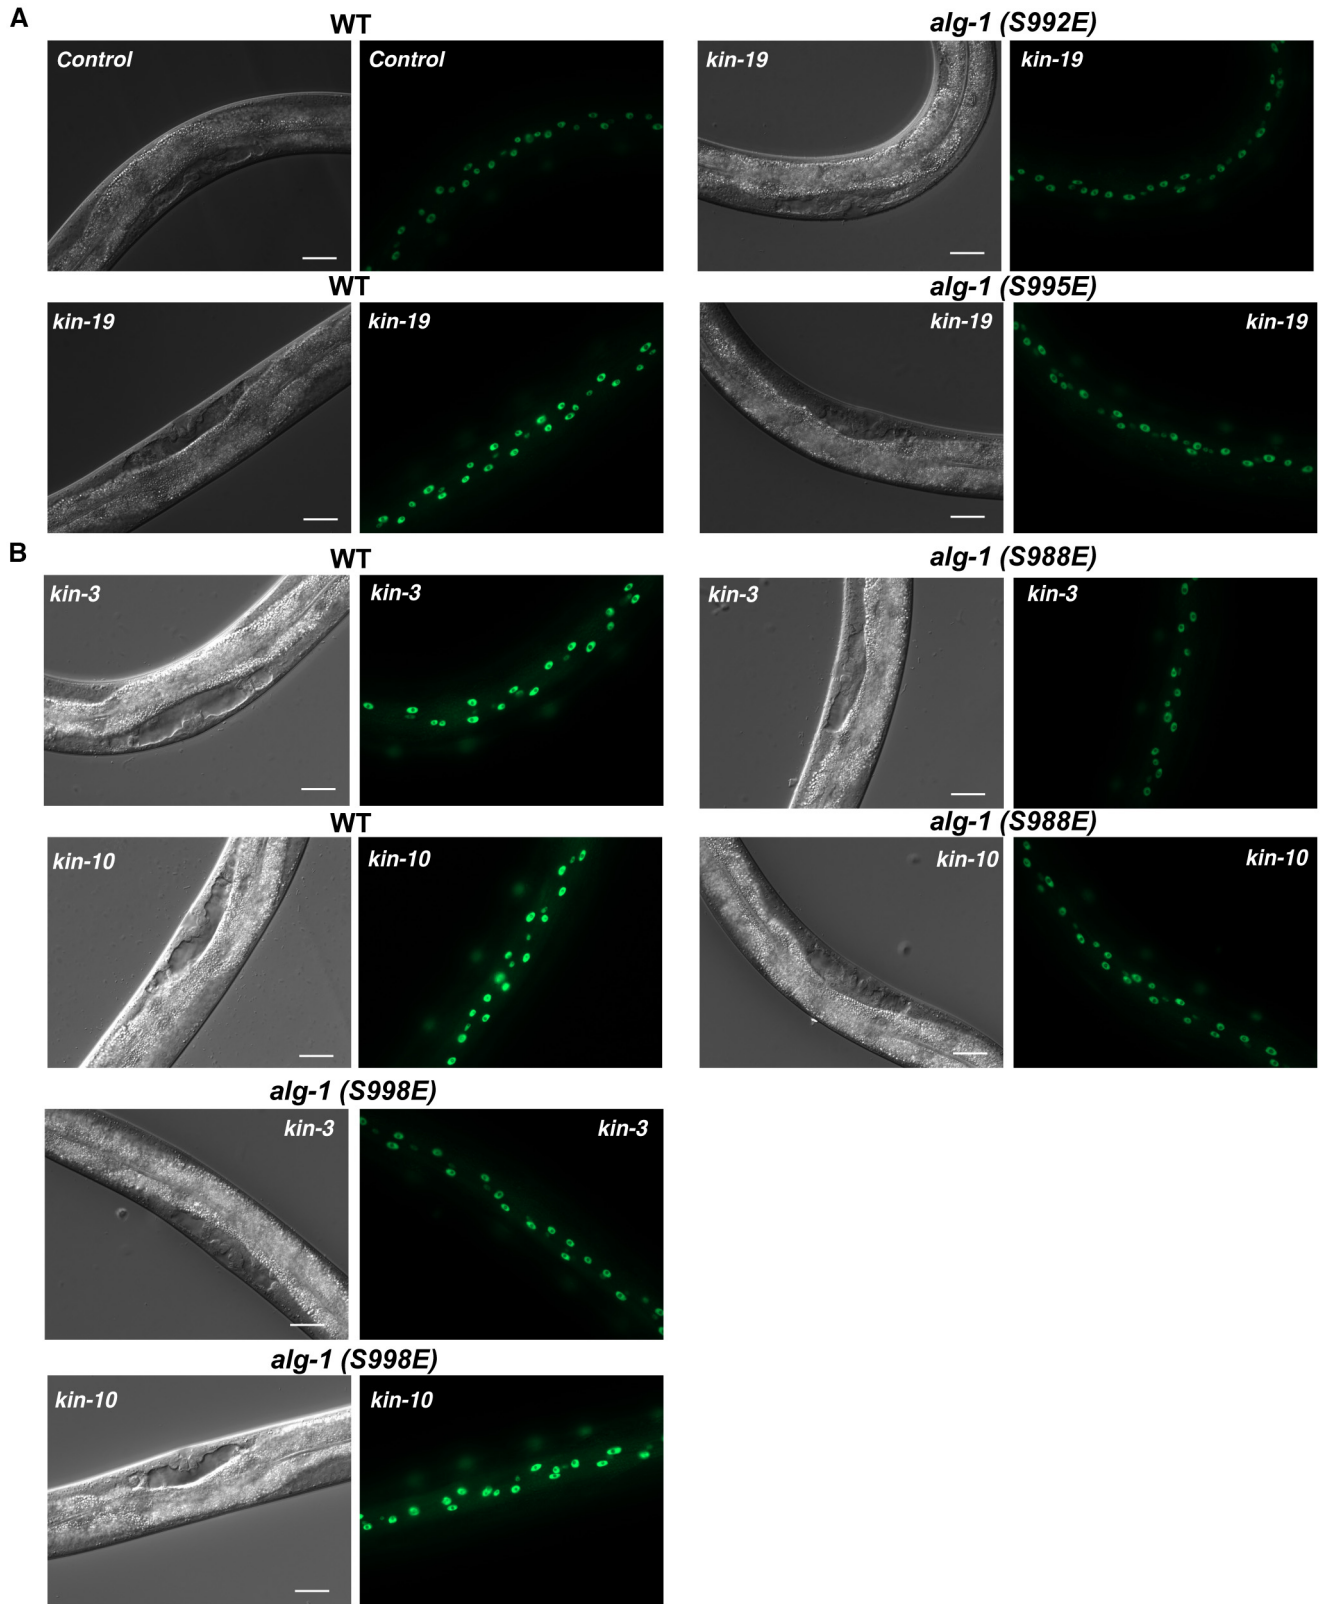

Figure EV5.
