# Supplementary material
Source: PubMed Central journal article supplement (PMC10626430)
Supplement: EMBR-24-e57250-s009.pdf [file EMBR-24-e57250-s009.pdf]

# Casein kinase 1 and 2 phosphorylate Argonaute proteins to regulate miRNA-mediated gene silencing

Vivek Shah, Julia Neumeier, Miguel Huberdeau, Daniela Zeitler, Astrid Bruckmann, Gunter Meister, and Martin Simard  
DOI: 10.15252/embr.202357250

Corresponding author(s): Martin Simard ([martin.simard@crchudequebec.ulaval.ca](mailto:martin.simard@crchudequebec.ulaval.ca))

---

## Review Timeline:

|                     |             |
|---------------------|-------------|
| Submission Date:    | 30th Mar 23 |
| Editorial Decision: | 3rd May 23  |
| Revision Received:  | 31st Jul 23 |
| Editorial Decision: | 17th Aug 23 |
| Revision Received:  | 18th Aug 23 |
| Accepted:           | 1st Sep 23  |

---

Editor: Martina Rembold

## Transaction Report:

(Note: With the exception of the correction of typographical or spelling errors that could be a source of ambiguity, letters and reports are not edited. Depending on transfer agreements, referee reports obtained elsewhere may or may not be included in this compilation. Referee reports are anonymous unless the Referee chooses to sign their reports.)

Dear Prof. Simard

Thank you for the submission of your research manuscript to our journal. We have now received the full set of referee reports that is copied below.

As you will see, the referees acknowledge that the findings are interesting and both referees are supportive of publication, given that a few issues and concerns are addressed, as outlined in their reports.

Given these constructive comments, we would like to invite you to revise your manuscript with the understanding that the referee concerns (as detailed above and in their reports) must be fully addressed and their suggestions taken on board. Please address all referee concerns in a complete point-by-point response. Acceptance of the manuscript will depend on a positive outcome of a second round of review. It is EMBO reports policy to allow a single round of revision only and acceptance or rejection of the manuscript will therefore depend on the completeness of your responses included in the next, final version of the manuscript.

We realize that it is difficult to revise to a specific deadline. In the interest of protecting the conceptual advance provided by the work, we recommend a revision within 3 months (August 3rd). Please discuss the revision progress ahead of this time with the editor if you require more time to complete the revisions.

I am also happy to discuss the revision further via e-mail or a video call, if you wish.

\*\*\*\*\*IMPORTANT NOTE:

We perform an initial quality control of all revised manuscripts before re-review. Your manuscript will FAIL this control and the handling will be DELAYED if the following APPLIES:

- 1) A data availability section providing access to data deposited in public databases is missing. If you have not deposited any data, please add a sentence to the data availability section that explains that.
- 2) Your manuscript contains statistics and error bars based on  $n=2$ . Please use scatter blots in these cases. No statistics should be calculated if  $n=2$ .

When submitting your revised manuscript, please carefully review the instructions that follow below. Failure to include requested items will delay the evaluation of your revision.\*\*\*\*\*

When submitting your revised manuscript, we will require:

- 1) a .docx formatted version of the manuscript text (including legends for main figures, EV figures and tables). Please make sure that the changes are highlighted to be clearly visible.
- 2) individual production quality figure files as .eps, .tif, .jpg (one file per figure). Please download our Figure Preparation Guidelines (figure preparation pdf) from our Author Guidelines pages <https://www.embopress.org/page/journal/14693178/authorguide> for more info on how to prepare your figures.
- 3) a .docx formatted letter INCLUDING the reviewers' reports and your detailed point-by-point responses to their comments. As part of the EMBO Press transparent editorial process, the point-by-point response is part of the Review Process File (RPF), which will be published alongside your paper.
- 4) a complete author checklist, which you can download from our author guidelines (<<https://www.embopress.org/page/journal/14693178/authorguide>>). Please insert information in the checklist that is also reflected in the manuscript. The completed author checklist will also be part of the RPF.
- 5) Please note that all corresponding authors are required to supply an ORCID ID for their name upon submission of a revised manuscript (<<https://orcid.org/>>). Please find instructions on how to link your ORCID ID to your account in our manuscript tracking system in our Author guidelines (<<https://www.embopress.org/page/journal/14693178/authorguide#authorshipguidelines>>)
- 6) We replaced Supplementary Information with Expanded View (EV) Figures and Tables that are collapsible/expandable online. A maximum of 5 EV Figures can be typeset. EV Figures should be cited as "Figure EV1, Figure EV2" etc... in the text and their

respective legends should be included in the main text after the legends of regular figures.

- For the figures that you do NOT wish to display as Expanded View figures, they should be bundled together with their legends in a single PDF file called \*Appendix\*, which should start with a short Table of Content. Appendix figures should be referred to in the main text as: "Appendix Figure S1, Appendix Figure S2" etc. See detailed instructions regarding expanded view here: <<https://www.embopress.org/page/journal/14693178/authorguide#expandedview>>

- Additional Tables/Datasets should be labeled and referred to as Table EV1, Dataset EV1, etc. Legends have to be provided in a separate tab in case of .xls files. Alternatively, the legend can be supplied as a separate text file (README) and zipped together with the Table/Dataset file.

7) Before submitting your revision, primary datasets (and computer code, where appropriate) produced in this study need to be deposited in an appropriate public database (see <<https://www.embopress.org/page/journal/14693178/authorguide#dataavailability>>).

Specifically, we recommend to provide public access to the mass spectrometry data.

Please remember to provide a reviewer password if the datasets are not yet public.

The accession numbers and database should be listed in a formal "Data Availability " section (placed after Materials & Method) that follows the model below (see also <<https://www.embopress.org/page/journal/14693178/authorguide#dataavailability>>). Please note that the Data Availability Section is restricted to new primary data that are part of this study.

#### # Data availability

The datasets (and computer code) produced in this study are available in the following databases:

- RNA-Seq data: Gene Expression Omnibus GSE46843 (<https://www.ncbi.nlm.nih.gov/geo/query/acc.cgi?acc=GSE46843>)  
- [data type]: [name of the resource] [accession number/identifier/doi] ([URL or identifiers.org/DATABASE:ACCESSION])

\*\*\* Note - All links should resolve to a page where the data can be accessed. \*\*\*

8) At EMBO Press we ask authors to provide source data for the main figures. Our source data coordinator will contact you to discuss which figure panels we would need source data for and will also provide you with helpful tips on how to upload and organize the files.

Additional information on source data and instruction on how to label the files are available <<https://www.embopress.org/page/journal/14693178/authorguide#sourcedata>>.

9) The journal requires a statement specifying whether or not authors have competing interests (defined as all potential or actual interests that could be perceived to influence the presentation or interpretation of an article). In case of competing interests, this must be specified in your disclosure statement. Further information: <https://www.embopress.org/competing-interests>

10) Figure legends and data quantification:

The following points must be specified in each figure legend:

- the name of the statistical test used to generate error bars and P values,
- the number (n) of independent experiments (please specify technical or biological replicates) underlying each data point,
- the nature of the bars and error bars (s.d., s.e.m.)
- If the data are obtained from n {less than or equal to} 5, show the individual data points in addition to the SD or SEM.
- If the data are obtained from n {less than or equal to} 2, use scatter blots showing the individual data points.

Discussion of statistical methodology can be reported in the materials and methods section, but figure legends should contain a basic description of n, P and the test applied.

See also the guidelines for figure legend preparation:

<https://www.embopress.org/page/journal/14693178/authorguide#figureformat>

- Please also include scale bars in all microscopy images.

11) Our journal encourages inclusion of \*data citations in the reference list\* to directly cite datasets that were re-used and obtained from public databases. Data citations in the article text are distinct from normal bibliographical citations and should

directly link to the database records from which the data can be accessed. In the main text, data citations are formatted as follows: "Data ref: Smith et al, 2001" or "Data ref: NCBI Sequence Read Archive PRJNA342805, 2017". In the Reference list, data citations must be labeled with "[DATASET]". A data reference must provide the database name, accession number/identifiers and a resolvable link to the landing page from which the data can be accessed at the end of the reference. Further instructions are available at <<https://www.embopress.org/page/journal/14693178/authorguide#referencesformat>>.

12) As part of the EMBO publication's Transparent Editorial Process, EMBO reports publishes online a Review Process File to accompany accepted manuscripts. This File will be published in conjunction with your paper and will include the referee reports, your point-by-point response and all pertinent correspondence relating to the manuscript.

You are able to opt out of this by letting the editorial office know ([emboreports@embo.org](mailto:emboreports@embo.org)). If you do opt out, the Review Process File link will point to the following statement: "No Review Process File is available with this article, as the authors have chosen not to make the review process public in this case."

We would also welcome the submission of cover suggestions, or motifs to be used by our Graphics Illustrator in designing a cover.

I look forward to seeing a revised form of your manuscript when it is ready and please let me know if you have questions or comments regarding the revision.

Yours sincerely,

Martina Rembold, PhD  
Senior Editor  
EMBO reports

\*\*\*\*\*

Referee #1:

The manuscript by Shah et al., identifies kinases that phosphorylate conserved residues on miRNA Argonautes (AGOs). Phosphorylation of AGO has previously been shown to be important for miRNA target regulation in human cell culture and *C. elegans* worms. Here the authors report that Casein Kinase I alpha (CK1A1) and Casein Kinase 2 (CK2) are responsible for the phosphorylation of specific sites on human AGO2 and worm ALG-1. They use a battery of in vitro and in vivo assays to delineate the phosphorylation sites and corresponding enzyme, as well as present evidence for priming activity needed for sequential phosphorylation at some positions. Additionally, they demonstrate the importance of these sites and kinases for miRNA target regulation in developing *C. elegans*. Overall, the studies are rigorous and support the conclusions. This work contributes new players and insights to the model describing how post-translational modifications regulate the ability of miRISC to bind, regulate, and release from specific mRNA targets.

Minor points:

1. The title could be improved. For example "a conserved cluster of Argonaute" does not make sense and it is the function of the AGO protein, not the miRNA (whose function is to act as a guide by base pairing).
2. Last sentence in Abstract - add "that" between suggest and phosphorylation
3. Can the authors speculate how kin-19 (RNAi) leads to increased let-7 family miRNA levels?

Referee #2:

Shah et al. describe in great detail how Argonaute phosphorylation is brought about by the kinases CK1A1 (KIN-19) and CK2 (KIN-3/KIN-10). This is important work, because the issue of regulation of Argonaute proteins is still generally poorly understood, and the finer details of how phosphorylation of a known phosphor-cluster proceeds represents an important step forward. Additionally, the authors implicate the modification of this cluster in the mRNA targeting step, which is also a new and important insight.

I overall strongly support publication of this work in EMBO Reports. However, a few, relatively minor, aspects will need to be addressed.

1-the manuscript is in general rather lengthy for the rather straightforward message of the paper. Especially the introduction would benefit from a bit more focus on the relevant issues that are studied. It is not a review we are talking about. The same holds true, however, for the results parts. The manuscript would gain clarity if the authors got to the main issue faster.

2-the authors describe effects on lin-41 on two different occasions. Once with a protein read-out, once with an mRNA readout. It would be better to address these two issues at the same time. When I was reading the results on mRNA effects on page 13 I felt like I had already gotten that result, but at the protein level, on page 11. Merging that could also help shorten the paper.

3-typo page 12 line 6: kin-19 should be kin-10 I guess

4-does the phospho-specific antibody recognize the phosphor-mimic mutation (S992E) in ALG-1? Also, to further demonstrate specificity of the Ab, it would be nice to show that a S998/995/998A triple mutant is still recognized. S992-PO<sub>4</sub> is needed, but given that this modification is at the top of a cascade, I think it cannot be excluded yet that the Ab also recognizes phosphorylation of some of the other residues. If so, this should show as a loss of signal by this Ab, if I'm correct. Alternatively, specific peptides should be used to nail down the specificity further.

5-To address better how CK1/2 affect miRNAs a miRNAseq experiment would be great. In the resent manuscript, RT-qPCR is used, which in principle is ok. miRNAseq, however, would be much more inclusive and give a general picture. It would give the paper just that little extra. Not an essential point, however.

6-on page 14 second paragraph, the authors describe that transfected AGO2 is phosphorylated. Yet they also use the same protein from the same source as a substrate in the experiments described just above. Some words on how this makes sense would be good. I guess that it rests on the assumption that only a small fraction is phosphorylated?

7-Figure 7E: is it possible to provide some feeling of data variance here? There is no error-bar or something like that. There should be replicates though, so some statistics should be possible. Without that, it is hard to know how strong the effects really are.

8-Sometimes the phrasing is a bit confusing. Notably when the authors talk about rescuing kin-19 kd effects by mutating alg-1. The authors tend to write that the kin-19 kd rescues the serine mutations, while the text overall talks about these experiments vice versa: the mutations are tested whether they rescue kin-x RNAi. This is a minor point, but it halted me a few times and made me re-read several sections.

### ***Point-by point Responses***

We thank all referees for their positive comments and insightful inputs on our manuscript. *Here are the detailed answers to their specific questions:*

#### **Referee #1:**

The manuscript by Shah et al., identifies kinases that phosphorylate conserved residues on miRNA Argonautes (AGOs). Phosphorylation of AGO has previously been shown to be important for miRNA target regulation in human cell culture and *C. elegans* worms. Here the authors report that Casein Kinase I alpha (CK1A1) and Casein Kinase 2 (CK2) are responsible for the phosphorylation of specific sites on human AGO2 and worm ALG-1. They use a battery of in vitro and in vivo assays to delineate the phosphorylation sites and corresponding enzyme, as well as present evidence for priming activity needed for sequential phosphorylation at some positions. Additionally, they demonstrate the importance of these sites and kinases for miRNA target regulation in developing *C. elegans*. Overall, the studies are rigorous and support the conclusions. This work contributes new players and insights to the model describing how post-translational modifications regulate the ability of miRISC to bind, regulate, and release from specific mRNA targets.

*We thank the referee for acknowledging this work's importance and for their positive comments.*

Minor points:

1. The title could be improved. For example "a conserved cluster of Argonaute" does not make sense and it is the function of the AGO protein, not the miRNA (whose function is to act as a guide by base pairing).

*We agree with the referee's suggestion and have modified the title to "Casein kinase 1 and 2 phosphorylate Argonaute proteins to regulate miRNA-mediated gene silencing".*

2. Last sentence in Abstract – add "that" between suggest and phosphorylation

*We added "that" between "suggest" and "phosphorylation" in the last sentence of the abstract.*

3. Can the authors speculate how kin-19 (RNAi) leads to increased let-7 family miRNA levels?

*We do not know for sure why only CK1A1 depletion (kin-19 RNAi) and not CK2 depletion (kin-3 and kin-10 RNAi) leads to a slight increase in the let-7 family of miRNA levels (which is also observed by the new miRNA sequencing data included in the revised manuscript (new Figure EV4A)). As a certain number of animals always display let-7-related phenotypes (alae defects, seam cells number) upon kin-19 knockdown in different genetic backgrounds affecting ALG-1 S992 and S995 phosphorylation (Figure 2), we can postulate that KIN-19 has likely other substrate(s) that are important for the stability and turnover of let-7 family miRNA. Interestingly, we can identify in silico putative phosphorylation sites of CK1A1 in DCS-1 and XRN-1, two controllers of let-7 family miRNA levels in C. elegans (Chatterjee et al, 2011; Bossé et al, 2013). We have now included this speculation in the revised manuscript as follows:*

*“Intriguingly, we found that the kin-19 RNAi knockdown in wild-type, alg-1(S992E) and alg-1(S995E) animals causes a significant increase in the levels of members of the let-7 family of miRNAs in all strains (Fig 4A-D), which could indicate that KIN-19 has likely other substrate(s) that are important for the stability and turnover of this miRNA family such as DCS-1 and XRN-1, two important controllers of miRNA levels (Bossé et al, 2013; Chatterjee et al, 2011), which contain consensus CK1A1 phosphorylation sites based on NetPhos 3.1 database (DCS-1: serine at position 63; XRN-1: serine at positions 359, 407, 658 and 1291 and threonine at position 1200).”*

**Referee #2:**

Shah et al. describe in great detail how Argonaute phosphorylation is brought about by the kinases CK1A1 (KIN-19) and CK2 (KIN-3/KIN-10). This is important work, because the issue of regulation of Argonaute proteins is still generally poorly understood, and the finer details of how phosphorylation of a known phosphor-cluster proceeds represents an important step forward. Additionally, the authors implicate the modification of this cluster in the mRNA targeting step, which is also a new and important insight. I overall strongly support publication of this work in in EMBO Reports. However, a few, relatively minor, aspects will need to be addressed.

*We thank the referee for their positive appraisal of our study and for highlighting the relevance of the study.*

1-the manuscript is in general rather lengthy for the rather straightforward message of the paper. Especially the introduction would benefit from a bit more focus on the relevant issues that are studied. It is not a review we are talking about. The same holds true, however, for the results parts. The manuscript would gain clarity if the authors got to the main issue faster.

*We thank the referee for their proposition. We have shortened the introduction section to focus only on relevant issues for the manuscript and edited the results section as well.*

2-the authors describe effects on lin-41 on two different occasions. Once with a protein read-out, once with an mRNA readout. It would be better to address these two issues at the same time. When I was reading the results on mRNA effects on page 13 I felt like I had already gotten that result, but at the protein level, on page 11. Merging that could also help shorten the paper.

*We thank the referee for their comment. We agree that the effects on lin-41 mRNA and protein levels would make more sense if merged in the same section. We have revised the manuscript accordingly and moved Figure 2E and 2F to new panels Figure 5D and 5H, respectively.*

3-typo page 12 line 6: kin-19 should be kin-10 I guess

*Thank you for pointing that out. The referee is right; it should be kin-10. We fixed the typo.*

4-does the phospho-specific antibody recognize the phosphor-mimic mutation (S992E) in ALG-1? Also, to further demonstrate specificity of the Ab, it would be nice to show that aS998/995/998A triple mutant is still recognized. S992-PO4 is needed, but given that this modification is at the top of a cascade, I think it cannot be excluded yet that the Ab also recognizes phosphorylation of some of the other residues. If so, this should show as a loss of signal by this Ab, if I'm correct. Alternatively, specific peptides should be used to nail down the specificity further.

*This is an excellent idea from the referee. We have conducted the required experiment and included the results in the revised Figure 3C and the expanded view Figure EV3. The phospho-specific antibody does not recognize the phospho-mimicking S992E mutation on ALG-1.*

*We used CRISPR/Cas9 to generate the triple mutant of alg-1 (S988A;S995A;S998A) as requested by the referee. This triple mutant only retains the serine at the 992 position and has the other 3 serines mutated to alanines. The phospho-specific antibody does indeed recognize this triple mutant, however, the signal is remarkably reduced when compared to ALG-1 WT (new Figure 3C). This new data aligns with the referee's prediction that the antibody would also recognize the other residues within the cluster due to the S992-PO4 being at the top of the cascade. This experiment also supports the idea that the S992 site initiates hierarchical phosphorylation of the other residues within the cluster. When the other serines are mutated to alanines (triple mutant), there is a significant loss of signal with this antibody. This new data has now been included and discussed in the revised manuscript.*

5-To address better how CK1/2 affect miRNAs a miRNAseq experiment would be great. In the recent manuscript, RT-qPCR is used, which in principle is ok. miRNAseq, however, would be much more inclusive and give a general picture. It would give the paper just that little extra. Not an essential point, however.



*We thank the referee for this suggestion that a miRNA-seq experiment would give a general idea of how CK1A1 and CK2 depletion affects miRNAs globally. We conducted a miRNA-seq experiment on wild-type animals to assess the global miRNA abundance upon CK1A1 and CK2 RNAi knockdown. We have now included these results in the new expanded view Figure EV4 (A, B, and C). We found that consistent with our RT-qPCR experiments, some members of the let-7 family of miRNAs (let-7 and miR-48) are slightly increased upon kin-19 RNAi. We also noted that the global miRNA abundance is unaffected upon CK1A1 and CK2 depletion. This is now included in the revised manuscript.*

6-on page 14 second paragraph, the authors describe that transfected AGO2 is phosphorylated. Yet they also use the same protein from the same source as a substrate in the experiments described just above. Some words on how this makes sense would be good. I guess that it rests on the assumption that only a small fraction is phosphorylated?

*We thank the referee for pointing this out. Indeed, the reviewer is correct, and we assume that there is enough unphosphorylated AGO2 available for the reaction. We reported in our initial study that about 10-15% of cellular AGO2 is phosphorylated. For clarification, we added the following sentence to the text:*

*“Since our previous quantifications revealed that about 10-15% of cellular AGO2 is phosphorylated (Quévillon Huberdeau et al, 2017) a substantial amount of unphosphorylated AGO2 should remain as potential substrate for CK1A1.”*

7-Figure 7E: is it possible to provide some feeling of data variance here? There is no error-bar or something like that. There should be replicates though, so some statistics should be possible. Without that, it is hard to know how strong the effects really are.

*We apologize that we did not include statistics in our previous figure. We now included two more biological replicates and added error bars for the percental phosphorylation in the diagram. This should provide some feeling for the variance of cluster phosphorylation between different biological replicates. The addition of more replicates does not change the observed effects and our conclusions.*

8-Sometimes the phrasing is a bit confusing. Notably when the authors talk about rescuing kin-19 kd effects by mutating alg-1. The authors tend to write that the kin-19 kd rescues the serine mutations, while the text overall talks about these experiments vice versa: the mutations are tested whether they rescue kin-x RNAi. This is a minor point, but it halted me a few times and made me re-read several sections.

*We are sorry for the confusion. We have adjusted the phrasing throughout the revised manuscript.*

## REFERENCES:

- Bossé GD, Rüegger S, Ow MC, Vasquez-Rifo A, Rondeau EL, Ambros VR, Grosshans H & Simard MJ (2013) The decapping scavenger enzyme DCS-1 controls microRNA levels in *Caenorhabditis elegans*. *Mol Cell* 50: 281–287
- Chatterjee S, Fasler M, Büssing I & Grosshans H (2011) Target-mediated protection of endogenous microRNAs in *C. elegans*. *Dev Cell* 20: 388–396
- Quévillon Huberdeau M, Zeitler DM, Hauptmann J, Bruckmann A, Fressigné L, Danner J, Piquet S, Strieder N, Engelmann JC, Jannot G, *et al* (2017) Phosphorylation of Argonaute proteins affects mRNA binding and is essential for microRNA-guided gene silencing in vivo. *EMBO J* 36: 2088–2106

Dear Prof. Simard

Thank you for the submission of your revised manuscript to EMBO Reports. We have now received the report from referee #2 who was asked to assess it.

As you will see, the referee supports publication, given that the discrepant results regarding let-7 regulation are resolved, as suggested by the referee. Please also provide a point-by-point response to this remaining concern.

From the editorial side, there are also a few things that we need before we can proceed with the official acceptance of your study.

- Please remove the Author Contributions from the manuscript file and make sure that the author contributions in our online submission system are correct and up-to-date. The information you specified in the system will be automatically retrieved and typeset into the article. You can enter additional information in the free text box provided, if you wish.
- Please move the Data availability section to the end of 'Material and Methods'.
- Please do not forget to remove the referee tokens from the Data availability section.
- It seems that you have reused images shown in Figure 2 A,B,C,D in Figure EV2 Part 1 and Part 2. Please clearly state this in the legends of Figure 2 and EV2. If these are representative examples, I suggest replacing these with other images to show the variance of phenotypes. Otherwise, please state the re-use.
- Tables EV1-3 need legends added to the corresponding files.
- Table EV4 should be made Dataset EV1 and needs the title added to the tab with the description. Please also update the callouts in the text. The file is uploaded as file type 'Dataset'.
- Figure EV2 is presented as spanning over two different pages. This will result in the partial display of the figure in the final version of the article. Please provide a one-page Figure EV2 or split the image in two Figures, Figure EV2 and EV3 with consequent renumbering of the following figures. But note that we can only typeset up to 5 EV figures.
- I attach to this email a related manuscript file with comments by our data editors. Please address all comments and upload a revised file with tracked changes with your final manuscript submission.
- Finally, EMBO Reports papers are accompanied online by A) a short (1-2 sentences) summary of the findings and their significance, B) 2-3 bullet points highlighting key results and C) a synopsis image that is 550x300-600 pixels large (width x height) in PNG for JPG format. You can either show a model or key data in the synopsis image. Please note that the size is rather small and that text needs to be readable at the final size. Please send us this information along with the revised manuscript.

I look forward to seeing a final version of your manuscript as soon as possible.

Kind regards,

Martina Rembold, PhD  
Senior Editor  
EMBO reports

\*\*\*\*\*

Referee #2:

The authors have addressed my concerns adequately. However, I do have one issue that relates to the new small RNA sequencing data in relation to the qPCR data that was shown initially (and which showed a minor upregulation of let-7 and some let-7 family members).

The authors mention in the rebuttal that a small upregulation of let-7 is detected by the sequencing, consistent with the qPCR. However, looking at the data, I have a hard time believing that let-7 is indeed up in the sequencing data (no statistics provided, but the data look very sharp). In the manuscript the authors do not mention this and they only refer to the sequencing data in light of 'no overall miRNA changes'. This is correct.

However, the authors do keep referring to the qPCR result, which claims elevated let-7 levels, and do not relate that to the sequencing data. I would argue that the qPCR method detects a minor decrease in expression of sn2841, which was used for normalization, rather than a small increase in let-7; especially since the authors do not have a miRNA qPCR that does not show upregulation.

One may argue which method is better suited for miRNA expression, qPCR or sequencing, but one cannot ignore contradicting results from two methods. I would go with the sequencing, because the normalization is based on a much broader set of transcripts. This leads to the conclusion that there is no effect on miRNA levels. I do not believe that this conclusion contradicts any of the findings and I do not see the point of keeping in the qPCR data. But if both are kept, the discrepancy needs to be addressed.

## ***Point-by-point Responses***

*We thank the reviewer for supporting our revised manuscript for publication at EMBO*

Referee #2:

The authors have addressed my concerns adequately. However, I do have one issue that relates to the new small RNA sequencing data in relation to the qPCR data that was shown initially (and which showed a minor upregulation of let-7 and some let-7 family members).

The authors mention in the rebuttal that a small upregulation of let-7 is detected by the sequencing, consistent with the qPCR. However, looking at the data, I have a hard time believing that let-7 is indeed up in the sequencing data (no statistics provided, but the data look very sharp). In the manuscript the authors do not mention this and they only refer to the sequencing data in light of 'no overall miRNA changes'. This is correct.

However, the authors do keep referring to the qPCR result, which claims elevated let-7 levels, and do not relate that to the sequencing data. I would argue that the qPCR method detects a minor decrease in expression of sn2841, which was used for normalization, rather than a small increase in let-7; especially since the authors do not have a miRNA qPCR that does not show upregulation.

One may argue which method is better suited for miRNA expression, qPCR or sequencing, but one cannot ignore contradicting results from two methods. I would go with the sequencing, because the normalization is based on a much broader set of transcripts. This leads to the conclusion that there is no effect on miRNA levels. I do not believe that this conclusion contradicts any of the findings and I do not see the point of keeping in the qPCR data. But if both are kept, the discrepancy needs to be addressed.

*We are glad that we were able to address all referee's concerns adequately. It is true that comparing RT-qPCR and small RNA sequencing is always difficult (especially when the effects detected are minor) as both methods use way different numbers of normalizers. As suggested by the reviewer, we have decided to keep only the small RNA sequencing data and remove the RT-qPCRs in the manuscript, as they provide a broader survey of the miRNAs levels upon the knockdown of the CK1A and CK2 orthologs, which is more informative to understand the contribution of those kinases in the microRNA pathway. As a result, we have now moved the sequencing data into the main figure (new Figure 4) and remove the RT-qPCR data from the manuscript. We also modified the Result Section accordingly.*

Prof. Martin Simard  
Oncology-CHU de Québec-Université Laval Research Centre  
9 McMahon  
Quebec City, Quebec G1R 3S3  
Canada

Dear Martin,

I am very pleased to accept your manuscript for publication in the next available issue of EMBO reports. Thank you for your contribution to our journal.

At the end of this email I include important information about how to proceed. Please ensure that you take the time to read the information and complete and return the necessary forms to allow us to publish your manuscript as quickly as possible.

As part of the EMBO publication's Transparent Editorial Process, EMBO reports publishes online a Review Process File to accompany accepted manuscripts. As you are aware, this File will be published in conjunction with your paper and will include the referee reports, your point-by-point response and all pertinent correspondence relating to the manuscript.

If you do NOT want this File to be published, please inform the editorial office within 2 days, if you have not done so already, otherwise the File will be published by default [contact: emboreports@embo.org]. If you do opt out, the Review Process File link will point to the following statement: "No Review Process File is available with this article, as the authors have chosen not to make the review process public in this case."

Thank you again for your contribution to EMBO reports and congratulations on a successful publication. Please consider us again in the future for your most exciting work.

Kind regards,

Martina

Martina Rembold, PhD  
Senior Editor  
EMBO reports

\*\*\*\*\*

THINGS TO DO NOW:

Please note that you will be contacted by Wiley Author Services to complete licensing and payment information. The required 'Page Charges Authorization Form' is available here: [https://www.embopress.org/pb-assets/embo-site/er\\_apc.pdf](https://www.embopress.org/pb-assets/embo-site/er_apc.pdf) - please download and complete the form and return to [embopressproduction@wiley.com](mailto:embopressproduction@wiley.com)

EMBO Press participates in many Publish and Read agreements that allow authors to publish Open Access with reduced/no publication charges. Check your eligibility: <https://authorservices.wiley.com/author-resources/Journal-Authors/open-access/affiliation-policies-payments/index.html>

You will receive proofs by e-mail approximately 2-3 weeks after all relevant files have been sent to our Production Office; you should return your corrections within 2 days of receiving the proofs.

Please inform us if there is likely to be any difficulty in reaching you at the above address at that time. Failure to meet our deadlines may result in a delay of publication, or publication without your corrections.

All further communications concerning your paper should quote reference number EMBOR-2023-57250V3 and be addressed to [emboreports@wiley.com](mailto:emboreports@wiley.com).

Should you be planning a Press Release on your article, please get in contact with [emboreports@wiley.com](mailto:emboreports@wiley.com) as early as possible, in order to coordinate publication and release dates.

## EMBO Press Author Checklist

|                                             |
|---------------------------------------------|
| Corresponding Author Name: Martin J. Simard |
| Journal Submitted to: EMBO Reports          |
| Manuscript Number: EMBOR-2023-57250V1       |

### USEFUL LINKS FOR COMPLETING THIS FORM

- [The EMBO Journal - Author Guidelines](#)
- [EMBO Reports - Author Guidelines](#)
- [Molecular Systems Biology - Author Guidelines](#)
- [EMBO Molecular Medicine - Author Guidelines](#)

### Reporting Checklist for Life Science Articles (updated January)

This checklist is adapted from Materials Design Analysis Reporting (MDAR) Checklist for Authors. MDAR establishes a minimum set of requirements in transparent reporting in the life sciences (see Statement of Task: [10.31222/osf.io/9sm4x](https://doi.org/10.31222/osf.io/9sm4x)). Please follow the journal's guidelines in preparing your manuscript.

**Please note that a copy of this checklist will be published alongside your article.**

### Abridged guidelines for figures

#### 1. Data

The data shown in figures should satisfy the following conditions:

- the data were obtained and processed according to the field's best practice and are presented to reflect the results of the experiments in an accurate and unbiased manner.
- ideally, figure panels should include only measurements that are directly comparable to each other and obtained with the same assay.
- plots include clearly labeled error bars for independent experiments and sample sizes. Unless justified, error bars should not be shown for technical
- if  $n < 5$ , the individual data points from each experiment should be plotted. Any statistical test employed should be justified.
- Source Data should be included to report the data underlying figures according to the guidelines set out in the authorship guidelines on Data

#### 2. Captions

Each figure caption should contain the following information, for each panel where they are relevant:

- a specification of the experimental system investigated (eg cell line, species name).
- the assay(s) and method(s) used to carry out the reported observations and measurements.
- an explicit mention of the biological and chemical entity(ies) that are being measured.
- an explicit mention of the biological and chemical entity(ies) that are altered/varied/perturbed in a controlled manner.
- the exact sample size (n) for each experimental group/condition, given as a number, not a range;
- a description of the sample collection allowing the reader to understand whether the samples represent technical or biological replicates (including how many animals, litters, cultures, etc.).
- a statement of how many times the experiment shown was independently replicated in the laboratory.
- definitions of statistical methods and measures:
  - common tests, such as t-test (please specify whether paired vs. unpaired), simple  $\chi^2$  tests, Wilcoxon and Mann-Whitney tests, can be unambiguously identified by name only, but more complex techniques should be described in the methods section;
  - are tests one-sided or two-sided?
  - are there adjustments for multiple comparisons?
  - exact statistical test results, e.g., P values = x but not P values < x;
  - definition of 'center values' as median or average;
  - definition of error bars as s.d. or s.e.m.

**Please complete ALL of the questions below.**  
Select "Not Applicable" only when the requested information is not relevant for your study.

### Materials

| Newly Created Materials                                                                                                                                                                                                     | Information included in the manuscript? | In which section is the information available?<br><small>(Reagents and Tools Table, Materials and Methods, Figures, Data Availability Section)</small> |
|-----------------------------------------------------------------------------------------------------------------------------------------------------------------------------------------------------------------------------|-----------------------------------------|--------------------------------------------------------------------------------------------------------------------------------------------------------|
| New materials and reagents need to be available; do any restrictions apply?                                                                                                                                                 | Yes                                     | Materials and Methods                                                                                                                                  |
| Antibodies                                                                                                                                                                                                                  | Information included in the manuscript? | In which section is the information available?<br><small>(Reagents and Tools Table, Materials and Methods, Figures, Data Availability Section)</small> |
| For <b>antibodies</b> provide the following information:<br>- Commercial antibodies: RRID (if possible) or supplier name, catalogue number and or/clone number<br>- Non-commercial: RRID or citation                        | Yes                                     | Materials and Methods                                                                                                                                  |
| DNA and RNA sequences                                                                                                                                                                                                       | Information included in the manuscript? | In which section is the information available?<br><small>(Reagents and Tools Table, Materials and Methods, Figures, Data Availability Section)</small> |
| <b>Short novel DNA or RNA including primers, probes:</b> provide the sequences.                                                                                                                                             | Yes                                     | Materials and Methods, Table EV2, Table EV3                                                                                                            |
| Cell materials                                                                                                                                                                                                              | Information included in the manuscript? | In which section is the information available?<br><small>(Reagents and Tools Table, Materials and Methods, Figures, Data Availability Section)</small> |
| <b>Cell lines:</b> Provide species information, strain. Provide accession number in repository <b>OR</b> supplier name, catalog number, clone number, and/OR RRID.                                                          | Yes                                     | Materials and Methods                                                                                                                                  |
| <b>Primary cultures:</b> Provide species, strain, sex of origin, genetic modification status.                                                                                                                               | Not Applicable                          |                                                                                                                                                        |
| Report if the cell lines were recently <b>authenticated</b> (e.g., by STR profiling) and tested for mycoplasma contamination.                                                                                               | Not Applicable                          |                                                                                                                                                        |
| Experimental animals                                                                                                                                                                                                        | Information included in the manuscript? | In which section is the information available?<br><small>(Reagents and Tools Table, Materials and Methods, Figures, Data Availability Section)</small> |
| <b>Laboratory animals or Model organisms:</b> Provide species, strain, sex, age, genetic modification status. Provide accession number in repository <b>OR</b> supplier name, catalog number, clone number, <b>OR</b> RRID. | Yes                                     | Materials and Methods                                                                                                                                  |
| <b>Animal observed in or captured from the field:</b> Provide species, sex, and age where possible.                                                                                                                         | Not Applicable                          |                                                                                                                                                        |
| Please detail <b>housing and husbandry conditions</b> .                                                                                                                                                                     | Not Applicable                          |                                                                                                                                                        |
| Plants and microbes                                                                                                                                                                                                         | Information included in the manuscript? | In which section is the information available?<br><small>(Reagents and Tools Table, Materials and Methods, Figures, Data Availability Section)</small> |
| <b>Plants:</b> provide species and strain, ecotype and cultivar where relevant, unique accession number if available, and source (including location for collected wild specimens).                                         | Not Applicable                          |                                                                                                                                                        |
| <b>Microbes:</b> provide species and strain, unique accession number if available, and source.                                                                                                                              | Not Applicable                          |                                                                                                                                                        |
| Human research participants                                                                                                                                                                                                 | Information included in the manuscript? | In which section is the information available?<br><small>(Reagents and Tools Table, Materials and Methods, Figures, Data Availability Section)</small> |
| If collected and within the bounds of privacy constraints report on age, sex and gender or ethnicity for all study participants.                                                                                            | Not Applicable                          |                                                                                                                                                        |
| Core facilities                                                                                                                                                                                                             | Information included in the manuscript? | In which section is the information available?<br><small>(Reagents and Tools Table, Materials and Methods, Figures, Data Availability Section)</small> |
| If your work benefited from core facilities, was their service mentioned in the acknowledgments section?                                                                                                                    | Yes                                     | Acknowledgements                                                                                                                                       |

### Design



| <b>Study protocol</b>                                                                                                                                            | <b>Information included in the manuscript?</b> | <b>In which section is the information available?</b><br>(Reagents and Tools Table, Materials and Methods, Figures, Data Availability Section) |
|------------------------------------------------------------------------------------------------------------------------------------------------------------------|------------------------------------------------|------------------------------------------------------------------------------------------------------------------------------------------------|
| If study protocol has been <b>pre-registered, provide DOI in the manuscript</b> . For clinical trials, provide the trial registration number <b>OR</b> cite DOI. | Not Applicable                                 |                                                                                                                                                |
| Report the <b>clinical trial registration number</b> (at ClinicalTrials.gov or equivalent), where applicable.                                                    | Not Applicable                                 |                                                                                                                                                |

| <b>Laboratory protocol</b>                                                                              | <b>Information included in the manuscript?</b> | <b>In which section is the information available?</b><br>(Reagents and Tools Table, Materials and Methods, Figures, Data Availability Section) |
|---------------------------------------------------------------------------------------------------------|------------------------------------------------|------------------------------------------------------------------------------------------------------------------------------------------------|
| Provide DOI OR other citation details if <b>external detailed step-by-step protocols</b> are available. | Not Applicable                                 |                                                                                                                                                |

| <b>Experimental study design and statistics</b>                                                                                                                                                                                                                                                                                            | <b>Information included in the manuscript?</b> | <b>In which section is the information available?</b><br>(Reagents and Tools Table, Materials and Methods, Figures, Data Availability Section) |
|--------------------------------------------------------------------------------------------------------------------------------------------------------------------------------------------------------------------------------------------------------------------------------------------------------------------------------------------|------------------------------------------------|------------------------------------------------------------------------------------------------------------------------------------------------|
| Include a statement about <b>sample size</b> estimate even if no statistical methods were used.                                                                                                                                                                                                                                            | Yes                                            | Materials and Methods, Figures, Source data                                                                                                    |
| Were any steps taken to minimize the effects of subjective bias when allocating animals/samples to treatment (e.g. <b>randomization procedure</b> )? If yes, have they been described?                                                                                                                                                     | Not Applicable                                 |                                                                                                                                                |
| Include a statement about <b>blinding</b> even if no blinding was done.                                                                                                                                                                                                                                                                    | Not Applicable                                 |                                                                                                                                                |
| Describe <b>inclusion/exclusion criteria</b> if samples or animals were excluded from the analysis. Were the criteria pre-established?                                                                                                                                                                                                     | Not Applicable                                 |                                                                                                                                                |
| If sample or data points were omitted from analysis, report if this was due to attrition or intentional exclusion and provide justification.                                                                                                                                                                                               |                                                |                                                                                                                                                |
| For every figure, are <b>statistical tests</b> justified as appropriate? Do the data meet the assumptions of the tests (e.g., normal distribution)? Describe any methods used to assess it. Is there an estimate of variation within each group of data? Is the variance similar between the groups that are being statistically compared? | Yes                                            | Materials and Methods, Figures                                                                                                                 |

| <b>Sample definition and in-laboratory replication</b>                                            | <b>Information included in the manuscript?</b> | <b>In which section is the information available?</b><br>(Reagents and Tools Table, Materials and Methods, Figures, Data Availability Section) |
|---------------------------------------------------------------------------------------------------|------------------------------------------------|------------------------------------------------------------------------------------------------------------------------------------------------|
| In the figure legends: state number of times the experiment was <b>replicated in laboratory</b> . | Yes                                            | Figures, Source data                                                                                                                           |
| In the figure legends: define whether data describe <b>technical or biological replicates</b> .   | Yes                                            | Figures, Source data                                                                                                                           |

## Ethics

| <b>Ethics</b>                                                                                                                                                                                                                                                                                            | <b>Information included in the manuscript?</b> | <b>In which section is the information available?</b><br>(Reagents and Tools Table, Materials and Methods, Figures, Data Availability Section) |
|----------------------------------------------------------------------------------------------------------------------------------------------------------------------------------------------------------------------------------------------------------------------------------------------------------|------------------------------------------------|------------------------------------------------------------------------------------------------------------------------------------------------|
| Studies involving <b>human participants</b> : State details of <b>authority granting ethics approval</b> (IRB or equivalent committee(s), provide reference number for approval).                                                                                                                        | Not Applicable                                 |                                                                                                                                                |
| Studies involving <b>human participants</b> : Include a statement confirming that <b>informed consent</b> was obtained from all subjects and that the experiments conformed to the principles set out in the WMA Declaration of Helsinki and the Department of Health and Human Services Belmont Report. | Not Applicable                                 |                                                                                                                                                |
| Studies involving <b>human participants</b> : For publication of <b>patient photos</b> , include a statement confirming that consent to publish was obtained.                                                                                                                                            | Not Applicable                                 |                                                                                                                                                |
| Studies involving experimental <b>animals</b> : State details of <b>authority granting ethics approval</b> (IRB or equivalent committee(s), provide reference number for approval. Include a statement of compliance with ethical regulations).                                                          | Not Applicable                                 |                                                                                                                                                |
| Studies involving <b>specimen and field samples</b> : State if relevant <b>permits</b> obtained, provide details of authority approving study; if none were required, explain why.                                                                                                                       | Not Applicable                                 |                                                                                                                                                |

| <b>Dual Use Research of Concern (DURC)</b>                                                                                                                                                                                                            | <b>Information included in the manuscript?</b> | <b>In which section is the information available?</b><br>(Reagents and Tools Table, Materials and Methods, Figures, Data Availability Section) |
|-------------------------------------------------------------------------------------------------------------------------------------------------------------------------------------------------------------------------------------------------------|------------------------------------------------|------------------------------------------------------------------------------------------------------------------------------------------------|
| Could your study fall under dual use research restrictions? Please check biosecurity documents and list of <b>select agents and toxins</b> (CDC): <a href="https://www.selectagents.gov/sat/list.htm">https://www.selectagents.gov/sat/list.htm</a> . | Not Applicable                                 |                                                                                                                                                |
| If you used a select agent, is the security level of the lab appropriate and reported in the manuscript?                                                                                                                                              | Not Applicable                                 |                                                                                                                                                |
| If a study is subject to dual use research of concern regulations, is the name of the <b>authority granting approval and reference number</b> for the regulatory approval provided in the manuscript?                                                 | Not Applicable                                 |                                                                                                                                                |

## Reporting

The MDAR framework recommends adoption of discipline-specific guidelines, established and endorsed through community initiatives. Journals have their own policy about requiring specific guidelines and recommendations to complement MDAR.

| <b>Adherence to community standards</b>                                                                                                                                                                                                                                                                                       | <b>Information included in the manuscript?</b> | <b>In which section is the information available?</b><br>(Reagents and Tools Table, Materials and Methods, Figures, Data Availability Section) |
|-------------------------------------------------------------------------------------------------------------------------------------------------------------------------------------------------------------------------------------------------------------------------------------------------------------------------------|------------------------------------------------|------------------------------------------------------------------------------------------------------------------------------------------------|
| State if relevant guidelines or checklists (e.g., <b>ICMJE, MIBBI, ARRIVE, PRISMA</b> ) have been followed or provided.                                                                                                                                                                                                       | Not Applicable                                 |                                                                                                                                                |
| For <b>tumor marker prognostic studies</b> , we recommend that you follow the <b>REMARK</b> reporting guidelines (see link list at top right). See author guidelines, under 'Reporting Guidelines'. Please confirm you have followed these guidelines.                                                                        | Not Applicable                                 |                                                                                                                                                |
| For <b>phase II and III randomized controlled trials</b> , please refer to the <b>CONSORT</b> flow diagram (see link list at top right) and submit the CONSORT checklist (see link list at top right) with your submission. See author guidelines, under 'Reporting Guidelines'. Please confirm you have submitted this list. | Not Applicable                                 |                                                                                                                                                |

## Data Availability

| <b>Data availability</b>                                                                                                                                                                          | <b>Information included in the manuscript?</b> | <b>In which section is the information available?</b><br>(Reagents and Tools Table, Materials and Methods, Figures, Data Availability Section) |
|---------------------------------------------------------------------------------------------------------------------------------------------------------------------------------------------------|------------------------------------------------|------------------------------------------------------------------------------------------------------------------------------------------------|
| Have <b>primary datasets</b> been deposited according to the journal's guidelines (see 'Data Deposition' section) and the respective accession numbers provided in the Data Availability Section? | Yes                                            | Data Availability Section                                                                                                                      |
| Were <b>human clinical and genomic datasets</b> deposited in a public access-controlled repository in accordance to ethical obligations to the patients and to the applicable consent agreement?  | Not Applicable                                 |                                                                                                                                                |
| Are <b>computational models</b> that are central and integral to a study available without restrictions in a machine-readable form? Were the relevant accession numbers or links provided?        | Not Applicable                                 |                                                                                                                                                |
| If publicly available data were reused, provide the respective <b>data citations in the reference list</b> .                                                                                      | Not Applicable                                 |                                                                                                                                                |
